# Supplementary material
Source: PubMed Central journal article supplement (PMC2234185)
Supplement: pnas_0709333105_1.pdf [file pnas_0709333105_1.pdf]

## Pinnately-veined species

## Palmately-veined species

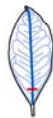

*Kalmia latifolia*

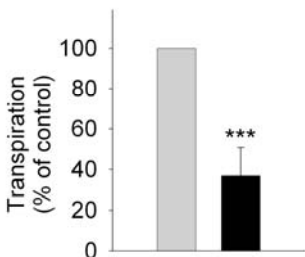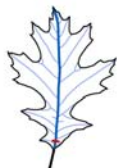

*Quercus rubra*

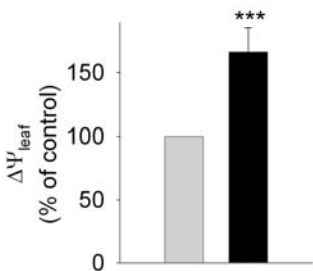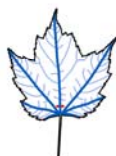

*Acer rubrum*

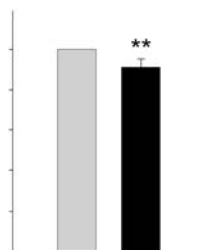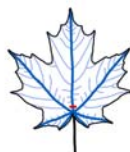

*Acer saccharum*

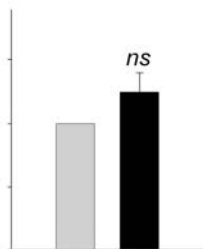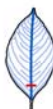

*Viburnum cassinoides*

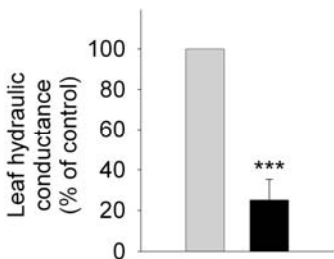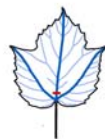

*Viburnum acerifolium*

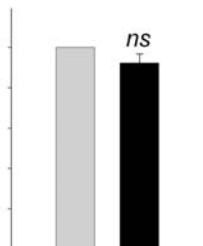

Control Treated
