# Supplementary material
Source: PubMed Central journal article supplement (PMC2234185)
Supplement: pnas_0709333105_4.pdf [file pnas_0709333105_4.pdf]

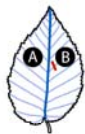

*Betula  
alleghaniensis*

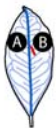

*Kalmia  
latifolia*

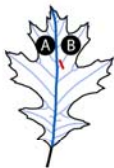

*Quercus  
rubra*

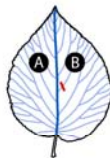

*Viburnum  
alnifolium*

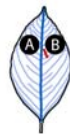

*Viburnum  
cassanoides*

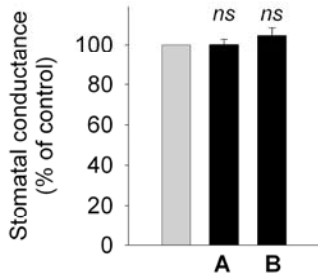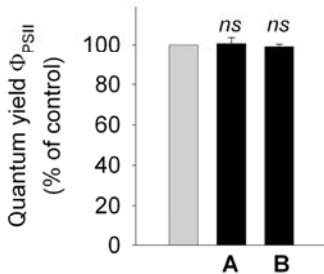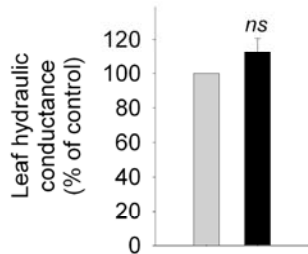

Control

Treated
