# Supplementary material
Source: PubMed Central journal article supplement (PMC2234185)

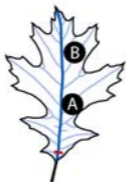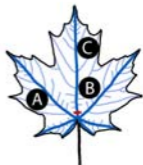

*Quercus rubra*

*Acer saccharum*

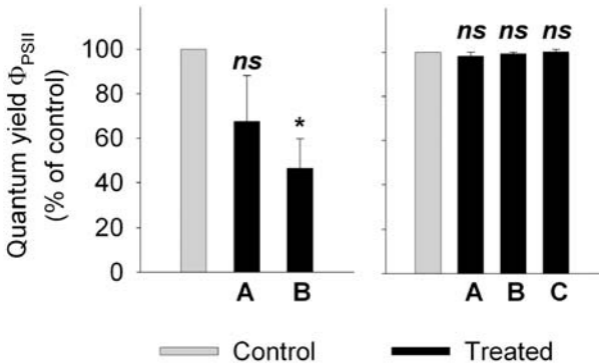

Supplement: pnas_0709333105_2.pdf [file pnas_0709333105_2.pdf]

● Pinnately-veined ○ Palmately-veined

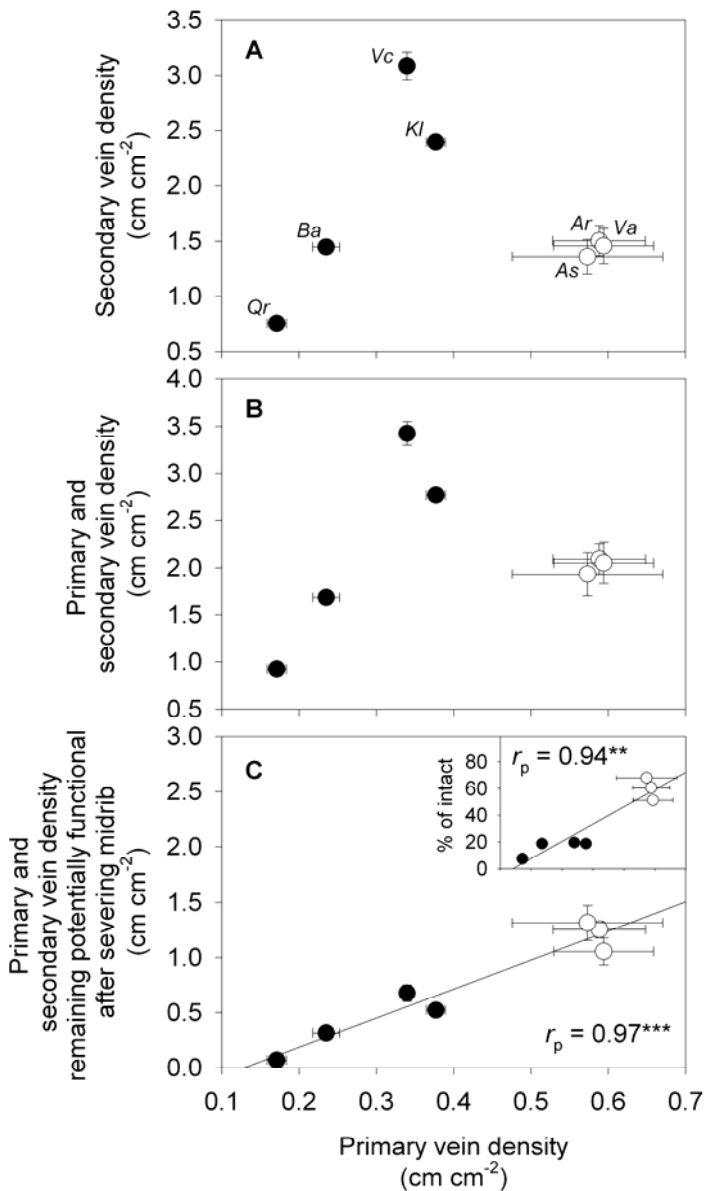

Supplement: pnas_0709333105_3.pdf [file pnas_0709333105_3.pdf]

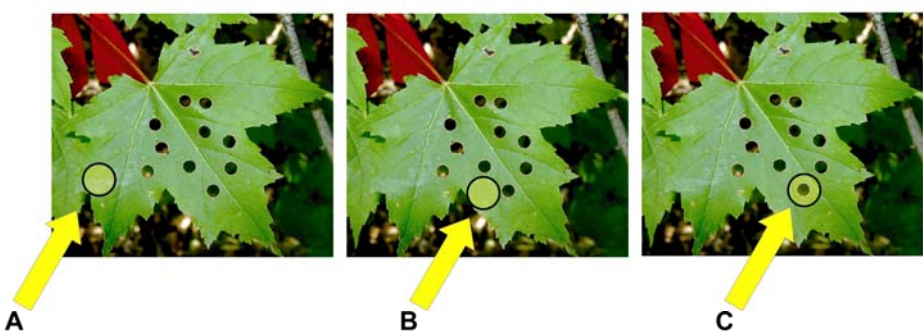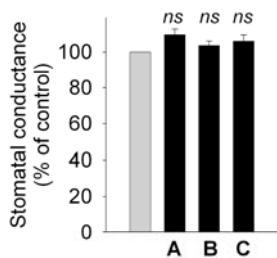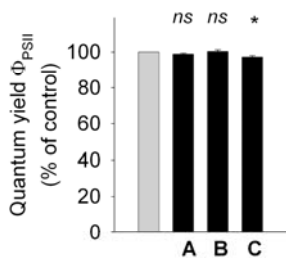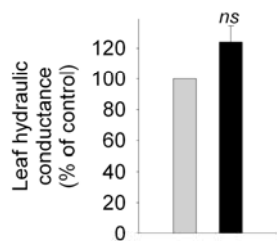

— Control      — Treated

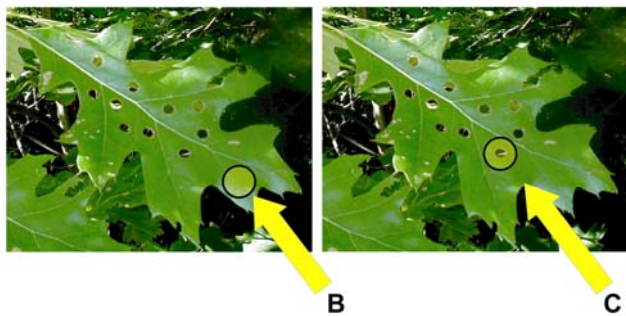

Supplement: pnas_0709333105_5.pdf [file pnas_0709333105_5.pdf]
